# Supplementary material for: Phylogenic study of Lemnoideae (duckweeds) through complete chloroplast genomes for eight accessions
Source: PeerJ journal article supplement (doi:10.7717/peerj.4186), 2017-12-22

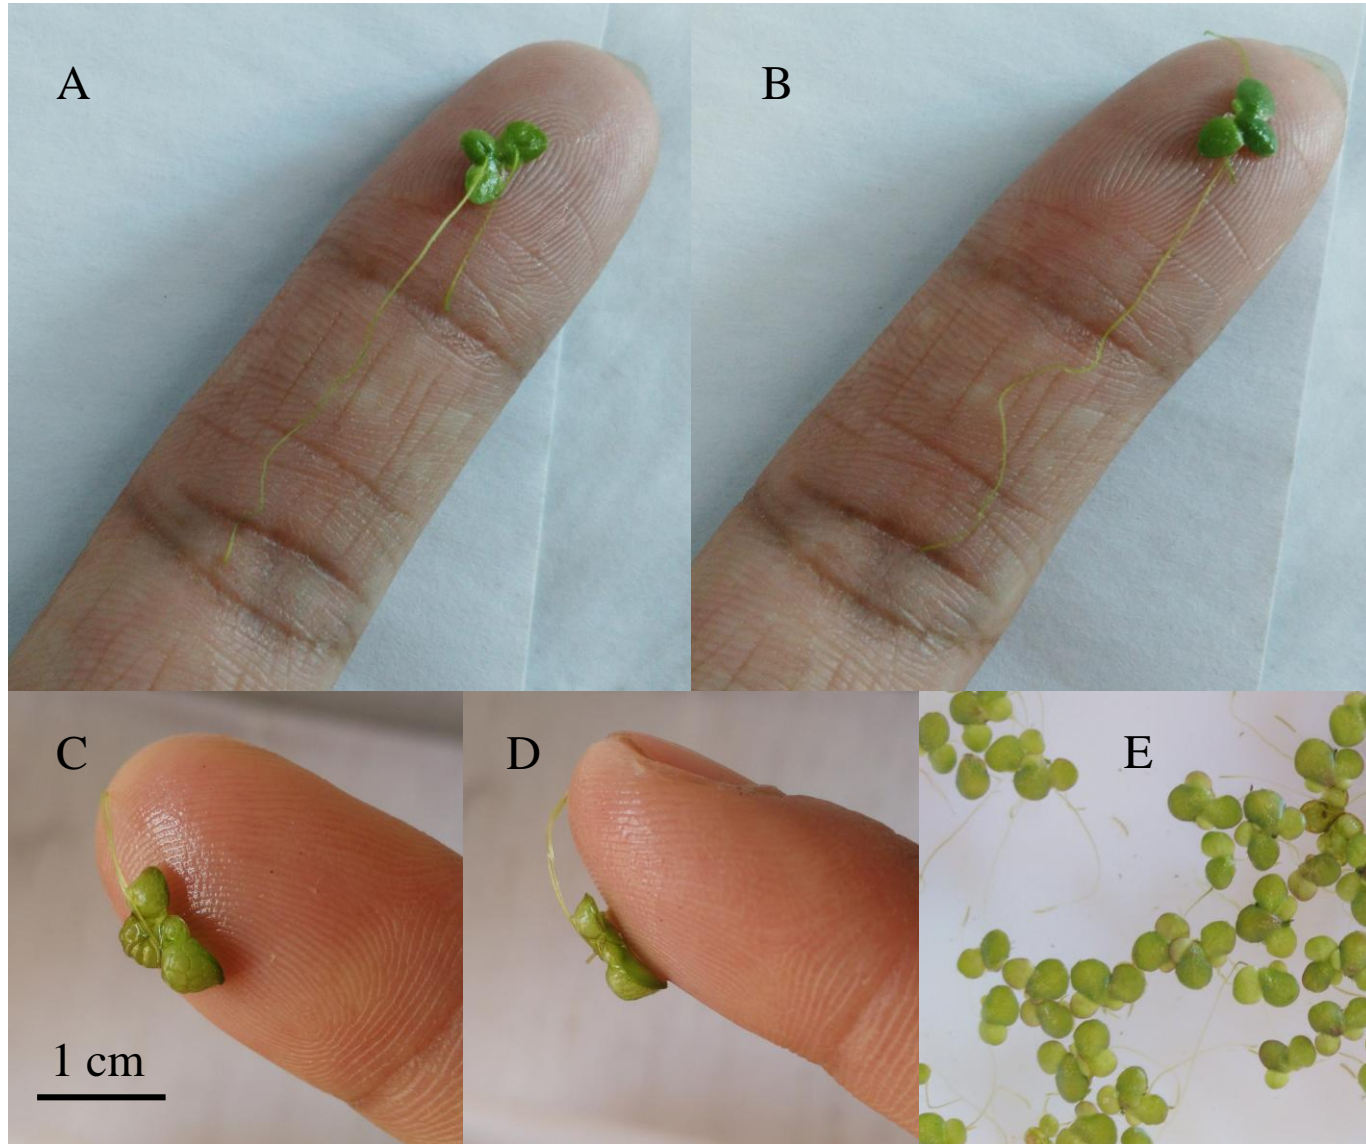

Supplement: Figure_S3___Lemna_japonica_strain_8695_and_Lemna_japonica_strain_0234.pdf [file Figure_S3___Lemna_japonica_strain_8695_and_Lemna_japonica_strain_0234.pdf]
